# Supplementary material for: A rationally designed novel receptor for probing cooperative interaction between metal ions and bivalent tryptophan side chain in solutionElectronic supplementary information (ESI) available: General experimental procedure, synthesis and characterization of EW2, and spectroscopic data. See http://www.rsc.org/suppdata/cc/b3/b310543a/
Source: Royal Society of Chemistry journal article supplement (doi:10.1039/b310543a), 2003-01-01
Supplement: b310543a.doc [file b310543a.doc]

**A rationally designed novel receptor for probing cooperative interaction between metalions and bivalent tryptophan side chain**

**in solution**

Yitong Li and Chi Ming Yang*

**Experimental Evidence and Supporting Information**

**1. Experimentals**

**1) Materials and general**

L-tryptophan methyl ester was from Novabiochem Cooperation; EDTA dianhydride was from Aldrich. 1H NMR spectra were recorded in deuterium oxide (Aldrich). All other solvents and reagents including dichloromethane, triethylamine, methanol and diethyl ether are of Analytical Grade，and were dried and purified before use.

**2) Synthesis procedure for EDTA-bis(L-tryptophan methyl ester) (EW2)**

*Solution 1:* To a solution of 3.3 mmol Trp－OCH3·HCl in 100ml DCM (dichloromethane) in a 250ml round bottom flask, 3ml TEA (triethylamine) was added, after mixing and complete dissolvation, it was transferred into a dropping funnel.

*Solution 2:* 1.5 mmol EDTA dianhydride (ethylenediaminetetraacetic dianhydride) and 50 ml DCM were mixed in a 250ml round bottom flask by magnetic stirring at room temperature.

*Solution 1* was added dropwise into *Solution 2* within 1 hr., after further stirring was continued for 2 hr., 2 ml HAc (acetic acid) was added to quench the excess TEA.

**3) Purification**

A small amount of silica gel (200－300 mesh) was added into the above reaction mixture, upon evaporation of the solvent to dryness under vacuum, the residue was subjected to column chromatography. An eluant of DCM : MeOH＝4 : 1 was used to completely wash out the excess Trp－OCH3, (TLC was used to follow the separation), further washing using MeOH to collect the product EW2. Upon evaporation of the solvent, 5 ml MeOH was added to dissolve the yellowish oil-like product. Finally, 25 ml diethylether was added to precipitate the product. Concealed at 0℃～5℃ for 1day, a further 7 ml MeOH was added and the product was completely dissolved by shaking. After 3 day at －5℃, a white solid was obtained. After filtering and washing with diethyl ether, and dried under vaccum, 0.65g of white powder was obtained, yield 62.5％.

**4) Characterization of EDTA-bis(L-tryptophan methyl ester) (EW2)**

NMR machine: VARIAN UNITY-plus 400.

1H NMR (400MHz, D2O): δ 2.554 (4H, NCH2CH2N), 3.102~3.265 (12H, all -CH2-), 3.706 (6H, OCH3), 4.727 (2H, chiral -CH-), 7.085~7.125 (2H, indolyl), 7.166~7.207 (4H, indolyl), 7.433~7.454 (2H, indolyl) and 7.569~7.589 (2H, indolyl);

IR (KBr) cm-1: 3286, 3045, 2951, 2672, 2484, 1739, 1673, 1522, 1437, 1346, 1215 and 1129;

A peak corresponding to the molecular ion was observed in the FAB-MS: Calcd for C34H40N6O10 : m/z = 692.3, Found 693.6 ([EW2+H]+) and MALDI-TOF-MS: Found 693.7 ([EW2+H]+) ; FT-ICR MS, Found 693.3.

**5) Characterization of 1:1 complexes of EW2 with transition metal ions by Electrospray Mass spectroscopy**

When the concentration of metal ions (Cu2+, Co2+ and Ni2+) were high，their complexations with EW2 lead to precipitation. After filtering the precipitates, washed with a small amount of distilled water, the complexes were re-dissloved into water. It seems that the solubility of either Co-EW2 or Ni-EW2 was slightly higher than Cu-EW2. All solutions at 3×10-3 M were prepared for Co-EW2 or Ni-EW2. A saturated solution was prepared for Cu-EW2 at ≥10-4M.

These solutions were subjected for ESI-MASS analysis. Results (Figure 1) showed that all these metal ions form 1:1 complexes with EW2, with strong single peak of [EW2 + M –1 (H+)] being invariably observed.

Mass of EW2-metal ion complexes: Cu-EW2, Calcd for exact mass C34H40N6O10Cu, m/z = 755.2, Found 754.2 [EW2 + M – H+]; Co-EW2, Calcd for exact mass C34H40N6O10Co, m/z = 751.2, Found 750.2 [EW2 + M – H+]; Ni-EW2, Calcd for exact mass C34H40N6O10Ni, m/z = 750.2, Found 749.1 [EW2 + M – H+]; Zn-EW2, Calcd for exact mass C34H40N6O10Zn, m/z = 756.2, Found 755.4 [EW2 + M – H+] (see Figure 1).

ES mass spectroscopy instrument：

HPLC－Ion-Trap Mass spectrometer, ESQUIRE～LC, HP & Bruker (Germany)

flow rate of syringe pump (ml/min): 2 l/min

**Fig 1a.** A mass spectrum of Cu-EW2..

**Fig 1b.** A mass spectrum of Co-EW2..

**Fig 1c.** A mass spectrum of Ni-EW2.

**Fig 1d.** A mass spectrum of Zn-EW2.

**6) Fluorescence quenching experiments**

Fluorescence emission spectra (Figure 2) were recorded on a computer-controlled Varian Cary eclipse fluorescence spectrophotometer (Sales and Service Varian Instruments, CA, USA) attached to a circulating water bath for thermal regulation.

**Fig 2a.** Fluorescence emission of 100 M EW2, quenching with Cu(II)

.

**Fig 2 b.** Fluorescence emission of 100 M EW2, quenching with Co(II)

**Fig 2c.** Fluorescence emission of 100 M EW2, quenching with Ni(II)

**Fig 2d.** Fluorescence emission of100 M EW2, quenching with La(III)

**Fig 2e.** Fluorescence emission of 100 M EW2, quenching with Fe(II)

**Fig. 2f.** Fluorescence emission of 100 M EW2, quenching with Mn(II)

**Fig 2g.** Fluorescence emission of 100 M EW2, quenching with Zn(II)

.

**Fig 2h.** Fluorescence emission of100 M EW2, quenching with Al(III)

**Fig 2i.** Fluorescence emission of 100 M EW2, quenching with Mg(II)

**Fig 2j.** Fluorescence emission of 100 M EW2, quenching with Na+

**Fig 2k.** Fluorescence emission of 100 M EW2, quenching with K+

**Fig. 2l.** Fluorescence emission of 200 M NH2Trp-OMe, quenching with Cu(II)

**Fig 2m.** pH-dependence of fluorescence emission of 100 M EW2

**Fig 2n.** Fluorescence emission of100 M EW2, quenching with Ca(II)

**Fig 2o.** Metal ion concentration-dependence of fluorescence intensity of 100 M EW2, and compared with Cu(II) ion-dependence of 200 M NH2-Trp-OMe at pH 4.60±0.03 with 200mM NaAc + HAc buffer.

**Figure 2.** Fluorescence emission (quenching with Cu2+, Co2+, Ni2+, La3+, Fe2+, Mn2+, Zn2+, Al3+ and Mg2+) spectra ( at 355.0nm ) of an aqueous solution of EW2 at a constant concentration of 100 M at pH＝4.60±0.03 (with buffer 200 mM NaAc + 200 mM HAc) and 25.0℃, with a fixed maximun excitation wavelength at 278.0 nm. A pH 4.6 for solutions was chosen on balance of the two scenarios: to avoid precipitation of transition metal ions at high pH, and to avoid fluorescence quenching by acid at lower pH.

**2a)** [CuCl2] = 0, 10 M, 20 M, 50 M, 100 M, 200 M, 500 M, 1000 M, 5000 M; molar ratios of [EW2] : [Cu2+] = ∞ (solid
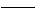
), 10:1 (dash
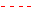
), 5:1 (dot
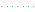
), 2:1 (dash dot
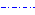
), 1:1 (dash dot dot
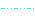
), 1:2 (short dash
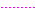
), 1:5 (short dot
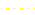
), 1:10 (short dash dot
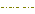
), 1:50 (solid
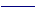
).

**2b)** [CoCl2] = 0, 10 M, 20 M, 50 M, 100 M, 200 M, 500 M, 1000 M, 5000 M; molar ratios of [EW2] : [Co2+] = ∞ (solid
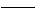
), 10:1 (dash
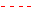
), 5:1 (dot
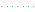
), 2:1 (dash dot
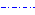
), 1:1 (dash dot dot
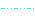
), 1:2 (short dash
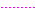
), 1:5 (short dot
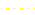
), 1:10 (short dash dot
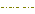
), 1:50 (solid
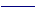
).

**2c)** [NiCl2] = 0, 10 M, 20 M, 50 M, 100 M, 200 M, 500 M, 1000 M, 5000 M; molar ratios of [EW2] : [Ni2+] = ∞ (solid
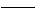
), 10:1 (dash
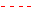
), 5:1 (dot
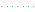
), 2:1 (dash dot
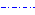
), 1:1 (dash dot dot
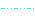
), 1:2 (short dash
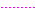
), 1:5 (short dot
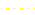
), 1:10 (short dash dot
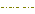
), 1:50 (solid
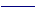
).

**2d)** [(CF3SO3) 3La] = 0, 10 M, 20 M, 50 M, 100 M, 200 M, 500 M, 1000 M, 5000 M; molar ratios of [EW2] : [La3+] = ∞ (solid
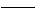
), 10:1 (dash
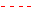
), 5:1 (dot
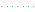
), 2:1 (dash dot
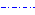
), 1:1 (dash dot dot
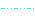
), 1:2 (short dash
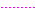
), 1:5 (short dot
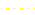
), 1:10 (short dash dot
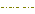
), 1:50 (solid
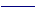
).

**2e)** [FeCl2] = 0, 10 M, 20 M, 50 M, 100 M, 200 M, 500 M, 1000 M, 5000 M; molar ratios of [EW2] : [Fe2+] = ∞ (solid
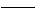
), 10:1 (dash
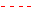
), 5:1 (dot
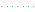
), 2:1 (dash dot
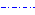
), 1:1 (dash dot dot
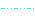
), 1:2 (short dash
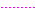
), 1:5 (short dot
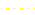
), 1:10 (short dash dot
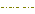
), 1:50 (solid
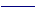
).

**2f)** [MnCl2] = 0, 10 M, 20 M, 50 M, 100 M, 200 M, 500 M, 1000 M, 5000 M; molar ratios of [EW2] : [Mn2+] = ∞ (solid
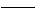
), 10:1 (dash
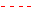
), 5:1 (dot
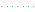
), 2:1 (dash dot
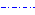
), 1:1 (dash dot dot
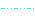
), 1:2 (short dash
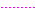
), 1:5 (short dot
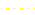
), 1:10 (short dash dot
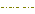
), 1:50 (solid
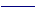
).

**2g)** [ZnCl2] = 0, 10 M, 20 M, 50 M, 100 M, 200 M, 500 M, 1000 M, 5000 M; molar ratios of [EW2] : [Zn2+] = ∞ (solid
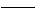
), 10:1 (dash
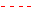
), 5:1 (dot
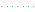
), 2:1 (dash dot
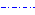
), 1:1 (dash dot dot
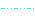
), 1:2 (short dash
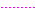
), 1:5 (short dot
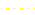
), 1:10 (short dash dot
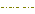
), 1:50 (solid
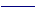
).

**2h)** [AlCl3] = 0, 10 M, 20 M, 50 M, 100 M, 200 M, 500 M, 1000 M, 5000 M; molar ratios of [EW2] : [Al3+] = ∞ (solid
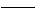
), 10:1 (dash
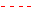
), 5:1 (dot
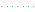
), 2:1 (dash dot
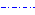
), 1:1 (dash dot dot
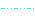
), 1:2 (short dash
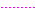
), 1:5 (short dot
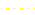
), 1:10 (short dash dot
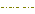
), 1:50 (solid
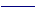
).

**2i)** [MgCl2] = 0, 10 M, 20 M, 50 M, 100 M, 200 M, 500 M, 1000 M, 5000 M; molar ratios of [EW2] : [Mg2+] = ∞ (solid
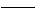
), 10:1 (dash
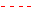
), 5:1 (dot
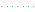
), 2:1 (dash dot
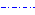
), 1:1 (dash dot dot
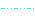
), 1:2 (short dash
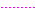
), 1:5 (short dot
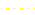
), 1:10 (short dash dot
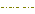
), 1:50 (solid
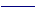
).

Fluorescence emission quenching (with NaCl, KCl and H+) spectra of an aqueous solution of 100 M EW2 at pH＝4.60±0.01 (with buffer 200 mM ammonium acetate buffer, and 25.0℃, with a fixed maximum excitation wavelength at 278.0 nm.

**2j)** [NaCl] = 0, 10 M, 20 M, 50 M, 100 M, 200 M, 500 M, 1000 M, 5000 M, molar ratios[EW2] : [Na+] = ∞ (solid
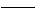
), 10:1 (dash
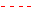
), 5:1 (dot
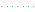
), 2:1 (dash dot
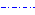
), 1:1 (dash dot dot
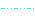
), 1:2 (short dash
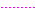
), 1:5 (short dot
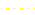
), 1:10 (short dash dot
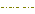
), 1:50 (solid
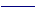
).

**2k)** [KCl] = 0, 10 M, 20 M, 50 M, 100 M, 200 M, 500 M, 1000 M, 5000 M, molar ratios of [EW2] : [K+] = ∞ (solid
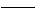
), 10:1 (dash
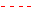
), 5:1 (dot
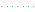
), 2:1 (dash dot
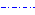
), 1:1 (dash dot dot
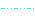
), 1:2 (short dash
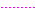
), 1:5 (short dot
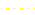
), 1:10 (short dash dot
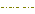
), 1:50 (solid
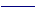
).

**2l)** Fluorescence emission (quenching with Cu2+) spectra（at 350.0 nm）of an aqueous solution of 2×10－4 M NH2-Trp-OMe at pH＝4.60±0.03 with 200 mM sodium acetate buffer, 25.0℃, with a fixed maximun excitation wavelength at 285.0 nm. [CuCl2] = 0, 10 M, 20 M, 50 M, 100 M, 200 M, 500 M, 1000 M, 2000 M and 5000 M; molar ratios of [2NH2-Trp-OMe] : [Cu2+] = ∞ (solid
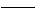
), 10:1 (dash ), 5:1 (dot ), 2:1 (dash dot ), 1:1 (dash dot dot ), 1:2 (short dash ), 1:5 (short dot ), 1:10 (short dash dot ), 1:20 (solid) and 1:50(dash ).

**2m)** pH dependence of fluorescence emission quenching ( at 355.0nm ) spectroscopy of an aqueous solution of EW2 at a constant concentration of 1×10-4M. Buffers are 400 mM CH2ClCOOH + 200 mM NaOH, pH = 2.60(solid); 130 mM CH2ClCOOH + 130 mM NaAc, pH = 3.48(dash); 200 mM NH4Ac + 200 mM HAc, pH = 4.58(dot); 650 mM NH4Ac + 90 mM HAc, pH = 5.40(dash dot ); 1560 mM NH4Ac + 70 mM HAc, pH = 5.85(dash dot dot ); 25 mM KH2PO4 + 25 mM Na2HPO4, pH = 7.33(short dash ); 25.0℃.

**2n)** [CaCl2] = 0, 10 M, 20 M, 30 M, 40 M, 50 M, 60 M, 70 M, 80 M, 90 M, 100 M; molar ratios of [EW2] : [Ca2+] = ∞ (), 10:1 (), 10:2 (), 10:3 (), 10:4 (), 10:5 (), 10:6 (), 10:7 (), 10:8 (), 10:9 (), 1:1 ()

**2o**) Quenching efficacy were summarized, displaying that when molar ratios of [M2+] to [EW2] < 1:1, all these metal ion quenched the fluorescence emission of EW2 in an almost linear fashion, with different slopes，their magnitude are in the orde of Cu2+ ()~ Fe2+ ()>>Co2+ ()> Ni2+ () >> Mn2+ ()> Zn2+ ()> La3+ () > Al3+ () > Mg2+ (). Maximum quenching efficiencies were reached when molar ratios of [M2+] : [EW2] became 1 : 1. A comparison of maximun fluorescence quenching by Cu2+ was made between EW2 and NH2Trp-OMe () at pH 4.60±0.03 with 200 mM sodium acetate buffer, 25.0℃.

The wavelength of maximum emission of tryptophan ranges from about 310－355 nm, depending on the electrostatic environment. Accordingly, we employed fluorescence quenching of EW2 by transition metal ions to examine metal ion-indole ring interactions. For EW2, fluorescence emission at 355 nm was recorded at 25℃ following excitation at 278 nm. For NH2-Trp-OMe (W), fluorescence emission at 350 nm was recorded following excitation at 285.0 nm.

**(1) Metal ions and pH dependence of fluorescence emission of EW2:**

**----A note on Figure 2o:**

Since fluorescence quenching to EW2 by Cu(II) is so strong and specific, the fluorescence intensity of EW2 was quenched essentially to zero when 1 mole-equivalent of Cu(II) added; therefore, it is impossible to obtain a Stern-Volmer plot (F0/F Vs. [M]) when the value of F reaches to zero, and here we plot the maximum fluorescence intensity against mole-equivalents of metal ions added to analyze the data.

**(2) Metal ions-dependece of fluorescence emission of NH2Trp-OMe (W)**

To test whether and how a single indole moiety within a free tryptophan molecule interacts with Cu2+, fluorescence emission of NH2-Trp-OMe (W) a fixed maximun excitation wavelength at 285.0 nm was examined in both the presence and absence of Cu2+, see **Fig. 2l.** As there are two copies of the indole moiety in every molecule of EW2，for a comparison, a solution of 200 M NH2-Trp-OMe (W) was employed. Between 0 and 0.5 mole-equivalent Cu(II) added, the maximum fluorescence emission band of W at 350 nm was little affected. After the addition of 0.5 mole-equivalent of Cu (II), the fluorescence intensity of W began to decrease nonlinearly as the concentration of Cu2+ increased. That is, during the first phase of the titration, Cu2+ ions are principally complexed by the NH2 group in W, and once all the accessible NH2 sites in W are occupied by Cu2+ ions, additional Cu2+ ions added would be available to interact with indole side chain in W.

Therefore, in a noteworthy contrast, a single indole group from W behaved very differently from that in EW2 in several aspects: **1)** Cu2+-binding with NH2-group in W is independent of fluorescence quenching to indole in W; **2)** EW2 is fluorescently sensitive to a trace amount of Cu2+; but W is not; **3)** Cooperative binding and metal ion-indole ring interaction displayed in EW2 is absent in W.

Instrumental parameter:

Fluorescent apparatus: Varian Cary eclipse fluorescence spectrophotometer

Water bath: Varian PCB 150 water peltier system

Fixed excitation: at 278nm

Scan emission mode

PMT Detector Voltage: 600(V)

Slit: 5 nm

Scan rate: 600 nm/min

Averaging time: 0.1000 s

Data interval: 1.0000 nm

Block temperture: 25.00 ℃

Excitation filter: Auto

Emission filter: Open

**7) Circular dichroism spectroscopic study**

Absorbance spectra were obtained at room temperature with a JASCO J-715 Spectropolarimeter (JASCO International Co., Ltd., Tokyo, Japan) interfaced to a personal computer. Circular dichroism titration was carried out for a solution of 100 M EW2 with Cu2+, Co2+ and Ni2+ in 200 mM sodium acetate buffer, 25.0℃, pH＝4.60±0.03.

**Fig 3a.**  CD-titration of 100 M EW2 with Cu(II).

**Fig 3b.**  CD-titration of 100 M EW2 with Co(II).

**Fig 3c.**  CD-titration of 100 M EW2 with Ni(II).

**Fig 3d.**  pH dependence of CD of 100 M EW2.

**Figure 3.** Circular Dichroism (with Cu2+, Co2+, Ni2+) spectroscopy of an aqueous solution of 100 M EW2 at pH ＝ 4.60±0.03 with 200 mM sodium acetate buffer, 25.0℃.

**3a)** [CuCl2] = 0, 10 M, 20 M, 50 M, 100 M and 200 M; molar ratios of [EW2] : [Cu2+] = ∞, (solid ), 10:1 (dash ), 5:1 (dot ), 2:1 (dash dot ) and 1:1 (dash dot dot ).

**3b)** [CoCl2] = 0, 10 M, 20 M, 50 M, 100 M and 200 M; molar ratios of [EW2] : [Co2+] = ∞, (solid ), 10:1 (dash ), 5:1 (dot ), 2:1 (dash dot ) and 1:1 (dash dot dot ).

**3c)** [NiCl2] = 0, 10 M, 20 M, 50 M, 100 M and 200 M; molar ratios of [EW2] : [Ni2+] = ∞, (solid ), 10:1 (dash ), 5:1 (dot ), 2:1 (dash dot ) and 1:1 (dash dot dot ).

**3d)** pH dependence of CD spectra of 100 M EW2. From the top to bottom, buffers are 400 mM CH2ClCOOH + 200 mM NaOH, pH = 2.60 (solid); 130 mM CH2ClCOOH + 130 mM NaAc, pH = 3.48 (dash); 200 mM NH4Ac + 200 mM HAc, pH = 4.58 (dot); 650 mM NH4Ac + 90 mM HAc, pH = 5.40 (dash dot ); 1560 mM NH4Ac + 70 mM HAc, pH = 5.85 (dash dot dot ); 25 mM KH2PO4 + 25 mM Na2HPO4, pH = 7.33 (short dash ); 8.7 mM KH2PO4 + 30.2 mM Na2HPO4, pH = 8.46 (short dot ); 610 mM NaAc + 140 mM Na2HPO4, pH = 9.78 (short dash dot ) 25.0℃.

Instrumental parameter:

Circular Dichroism apparatus: JASCO J-715 Spectropolarimeter

Metal-Ion Dependence measurement parameter:

Data mode : CD

Resolution : 0.2 nm

Band width : 1.0 nm

Sensitivity : 20 mdeg

Response : 4 sec

Speed : 50 nm/min

Accumulation : 1

pH Dependence measurement parameter:

Data mode : CD

Resolution : 1 nm

Band width : 1.0 nm

Sensitivity : 20 mdeg

Response : 4 sec

Speed : 50 nm/min

Accumulation : 1
